# Supplementary material for: Structural basis of nucleoside and nucleoside drug selectivity by concentrative nucleoside transporters
Source: eLife. 2014 Jul 31;3:e03604. doi: 10.7554/eLife.03604 (PMC4139061; doi:10.7554/eLife.03604)
Supplement: Figure 5—source data 1. — Total charge transported (μC) was calculated as the area under the curve of the current trace after application of the indicated nucleoside to hCNT-expressing Xenopus oocytes. Each row represents a separate experiment done using a different oocyte. The ratios of the total charge transported for the nucleosides are shown in the last columns. DOI: http://dx.doi.org/10.7554/eLife.03604.021 [file elife03604s002.xlsx]

## Sheet: Sheet1
Figure 5 - Source data 1. Total charge data. Total charge transported (μC) was calculated as the area under the curve of the current trace after application of the indicated nucleoside to hCNT-expressing Xenopus oocytes. Each row represents a separate experiment done using a different oocyte. The ratios of the total charge transported for the nucleosides are shown in the last columns.
	hCNT3
	200 μM Gem	200 μM Pyr-Gem	200 μM Gem + Pyr-Gem	Qgem/Qpyr-gem	Qgem/Qgem + pyr-gem
Exp. 1	6.2311	0.0578	3.25	107.804	1.91726
Exp. 2	8.07	0.0722	3.575	111.773	2.25734
Exp. 3	5.865	0.0867	3.705	67.6471	1.583
Exp. 4	6.11	0.0578	3.544	105.709	1.72404
Exp. 5	7.58	0.0433	2.5418	175.058	2.98214
Exp. 6	8.097	0.0706	2.665	114.688	3.03827
Exp. 7	6.305	0.0928	2.99	67.9418	2.1087
Exp. 8	6.685	0.1231	2.0567	54.3054	3.25035
Exp. 9	7.185	0.1354	3.2123	53.065	2.23672
Exp. 10	6.07	0.0846	3.5123	71.7494	1.72821
Exp. 11	8.0679	0.0554	3.9576	145.63	2.03858
Exp. 12	5.5435	0.0412	2.5143	134.551	2.20479
Exp. 13	6.4563	0.1123	2.9535	57.4915	2.18598
Exp. 14	8.5345	0.11	2.1231	77.5864	4.01983
Mean	7.0837	0.0817	3.0429	96.0715	2.3768
S.E.	0.2373	0.0080003	0.159	10.1131	0.185177
	hCNT1
	200 μM Gem	200 μM Pyr-Gem	Qpyr-gem/Qgem
Exp. 1	0.176	0.845	4.80114
Exp. 2	0.1896	0.624	3.29114
Exp. 3	0.1083	0.975	9.00277
Exp. 4	0.0948	1.04	10.9705
Exp. 5	0.1219	0.7475	6.13208
Exp. 6	0.1273	0.7865	6.17832
Exp. 7	0.1123	0.7345	6.54052
Exp. 8	0.0912	0.7544	8.27193
Exp. 9	0.1367	1.0542	7.71178
Exp. 10	0.0956	0.7132	7.46025
Exp. 11	0.1636	0.7788	4.76039
Mean	0.1273	0.823	6.82916
S.E.	0.0087118	0.0424	0.653918
