# Supplementary material for: Structural basis of nucleoside and nucleoside drug selectivity by concentrative nucleoside transporters
Source: eLife. 2014 Jul 31;3:e03604. doi: 10.7554/eLife.03604 (PMC4139061; doi:10.7554/eLife.03604)
Supplement: Figure 6—source data 1. — Total charge transported (μC) was calculated as the area under the curve of the current trace after application of the indicated nucleoside to hCNT-expressing Xenopus oocytes. Each row represents a separate experiment done using a different oocyte. The ratios of the total charge transported for the nucleosides are shown in the last columns. DOI: http://dx.doi.org/10.7554/eLife.03604.025 [file elife03604s003.xlsx]

## Sheet: Sheet1
Figure 6 - Source data 1. Total charge data. Total charge transported (μC) was calculated as the area under the curve of the current trace after application of the indicated nucleoside to hCNT-expressing Xenopus oocytes. Each row represents a separate experiment done using a different oocyte. The ratios of the total charge transported for the nucleosides are shown in the last columns.
	hCNT3 (375L/446V)
	400 μM Gem	400 μM Pyr-Gem	Qgem/Qpyr-gem
Exp. 1	5.6535	4.6818	1.20755
Exp. 2	6.4535	2.575	2.50621
Exp. 3	5.6786	4.705	1.20693
Exp. 4	4.4557	4.665	0.955134
Exp. 5	7.4564	6.99	1.06672
Exp. 6	4.5675	4.0787	1.11984
Exp. 7	5.5623	2.9567	1.88125
Exp. 8	7.8456	4.9679	1.57926
Exp. 9	4.0679	4.9679	0.818837
Exp. 10	7.0568	6.079	1.16085
Exp. 11	4.1079	6.2342	0.65893
Mean	5.6969	4.864	1.28741
S.E.	0.3694	0.392	0.158226
	hCNT1 (353V/424L)
	400 μM Gem	400 μM Pyr-Gem	Qpyr-gem/Qgem
Exp. 1	0.743	0.2654	0.357201
Exp. 2	0.542	0.3123	0.576199
Exp. 3	0.5723	0.2134	0.372881
Exp. 4	0.8576	0.3057	0.35646
Exp. 5	0.5634	0.2091	0.37114
Exp. 6	0.8576	0.1124	0.131063
Exp. 7	0.5858	0.3234	0.552066
Exp. 8	0.8134	0.2957	0.363536
Mean	0.6919	0.2551	0.385068
S.E.	0.0494	0.0254	0.0484287
