# Supplementary material for: Structural basis of nucleoside and nucleoside drug selectivity by concentrative nucleoside transporters
Source: eLife journal article supplement (doi:10.7554/elife.03604), 2014-07-31
Supplement: supp [file elife_poa_e03604_Figure_1_figure_supplement_1.pdf › elife_poa_e03604_Figure_1_figure_supplement_1.pdf]

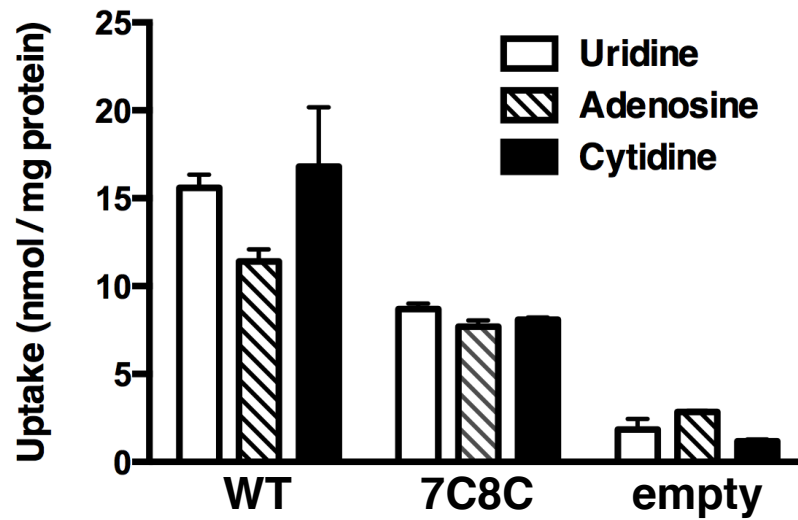

**Figure 1 – figure supplement 1. vcCNT-7C8C maintains nucleoside transport activity.** Wild-type (WT) and 7C8C vcCNT were reconstituted into lipid vesicles and assessed for their ability to support the uptake of 2  $\mu$ M of  $^3$ H-labeled nucleoside as described (Johnson et al., 2012). The data shown represent 2 min timepoints. Empty vesicles were included as a negative control.
