# Supplementary material for: Structural basis of nucleoside and nucleoside drug selectivity by concentrative nucleoside transporters
Source: eLife journal article supplement (doi:10.7554/elife.03604), 2014-07-31
Supplement: supp [file elife_poa_e03604_Figure_1_figure_supplement_2.pdf › elife_poa_e03604_Figure_1_figure_supplement_2.pdf]

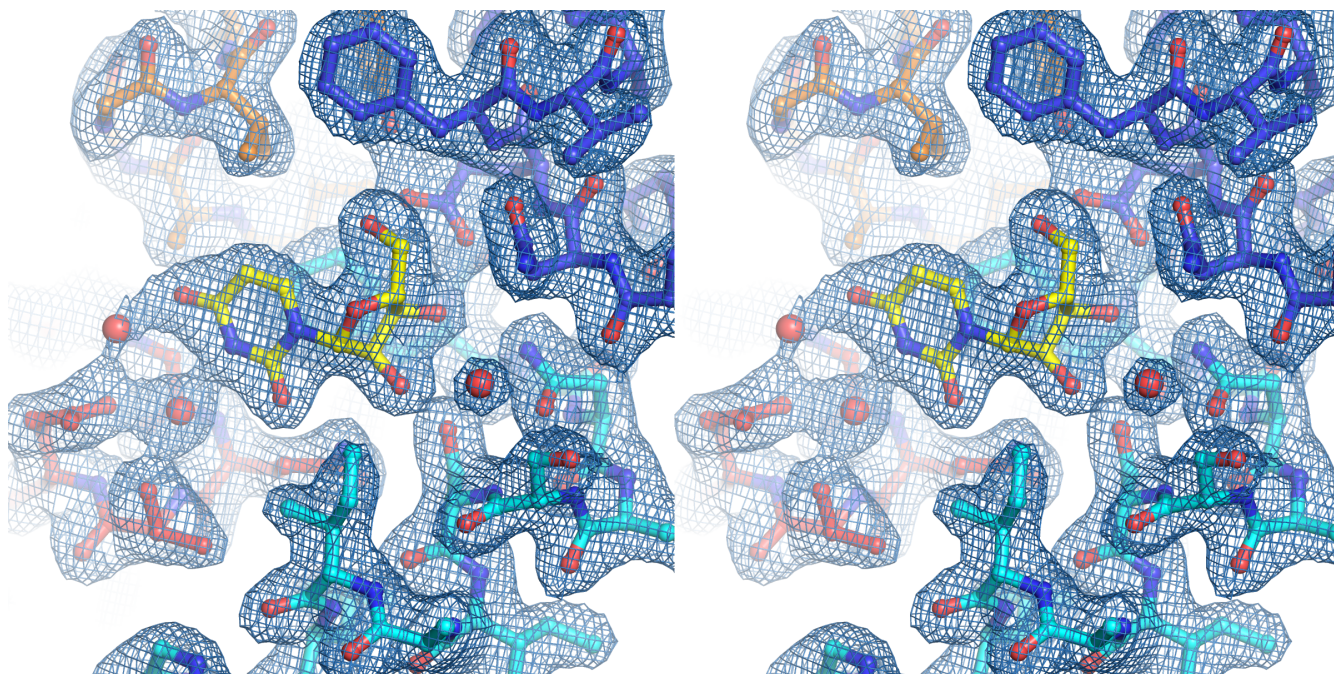

**Figure 1 – figure supplement 2. Electron density at the nucleoside-binding site of vcCNT-7C8C-uridine.** The nucleoside-binding site of vcCNT-7C8C bound to uridine is shown in stereo in stick representation in the same orientation and colored as in Figure 1C. Uridine is yellow and the red spheres are water molecules. The resolution is 2.1 Å and density shown is from a 2Fo-Fc electron density map contoured at  $1\sigma$ .
