# Supplementary material for: Structural basis of nucleoside and nucleoside drug selectivity by concentrative nucleoside transporters
Source: eLife journal article supplement (doi:10.7554/elife.03604), 2014-07-31
Supplement: supp [file elife_poa_e03604_Figure_2_figure_supplement_1.pdf › elife_poa_e03604_Figure_2_figure_supplement_1.pdf]

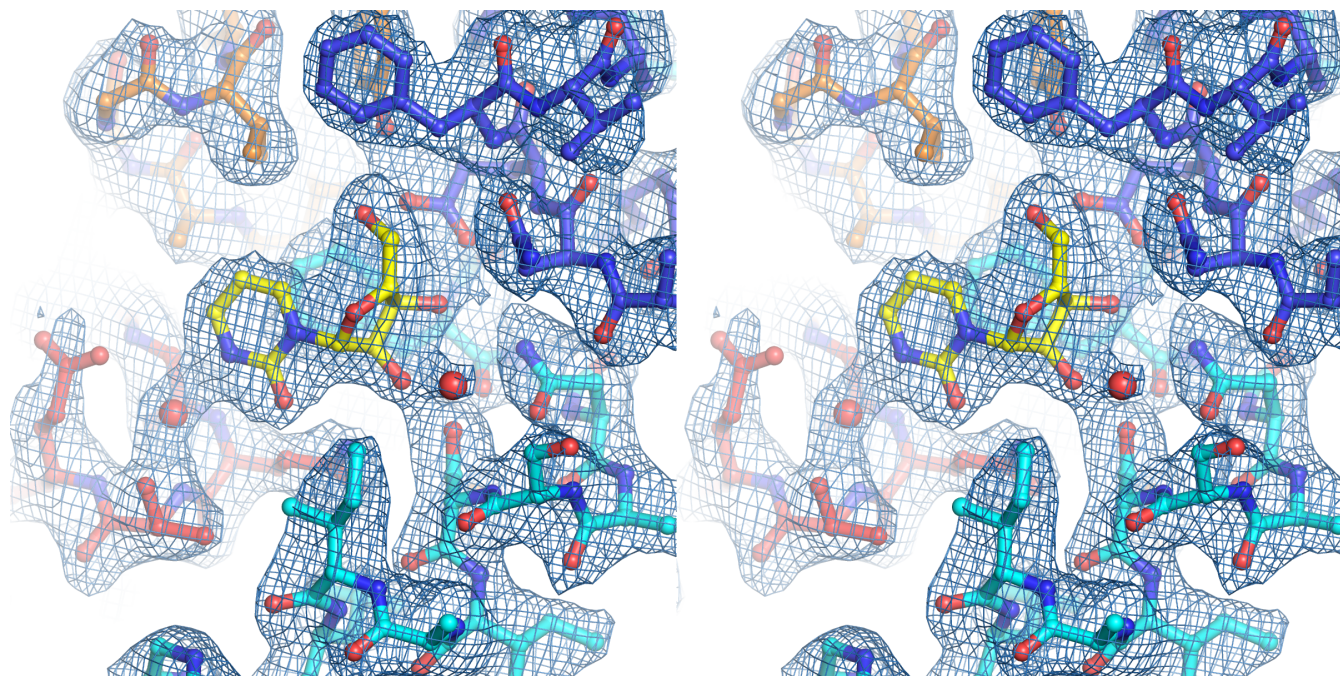

**Figure 2 – figure supplement 1. Electron density at the nucleoside-binding site of vcCNT-zebularine.** The nucleoside-binding site of vcCNT bound to zebularine is shown in stereo in stick representation in the same orientation and colored as in Figure 2A. Zebularine is yellow and the red spheres are water molecules. The resolution is 2.9 Å and density shown is from a  $2F_o - F_c$  electron density map contoured at  $1\sigma$ .
