# Supplementary material for: Structural basis of nucleoside and nucleoside drug selectivity by concentrative nucleoside transporters
Source: eLife journal article supplement (doi:10.7554/elife.03604), 2014-07-31
Supplement: supp [file elife_poa_e03604_Figure_2_figure_supplement_3.pdf › elife_poa_e03604_Figure_2_figure_supplement_3.pdf]

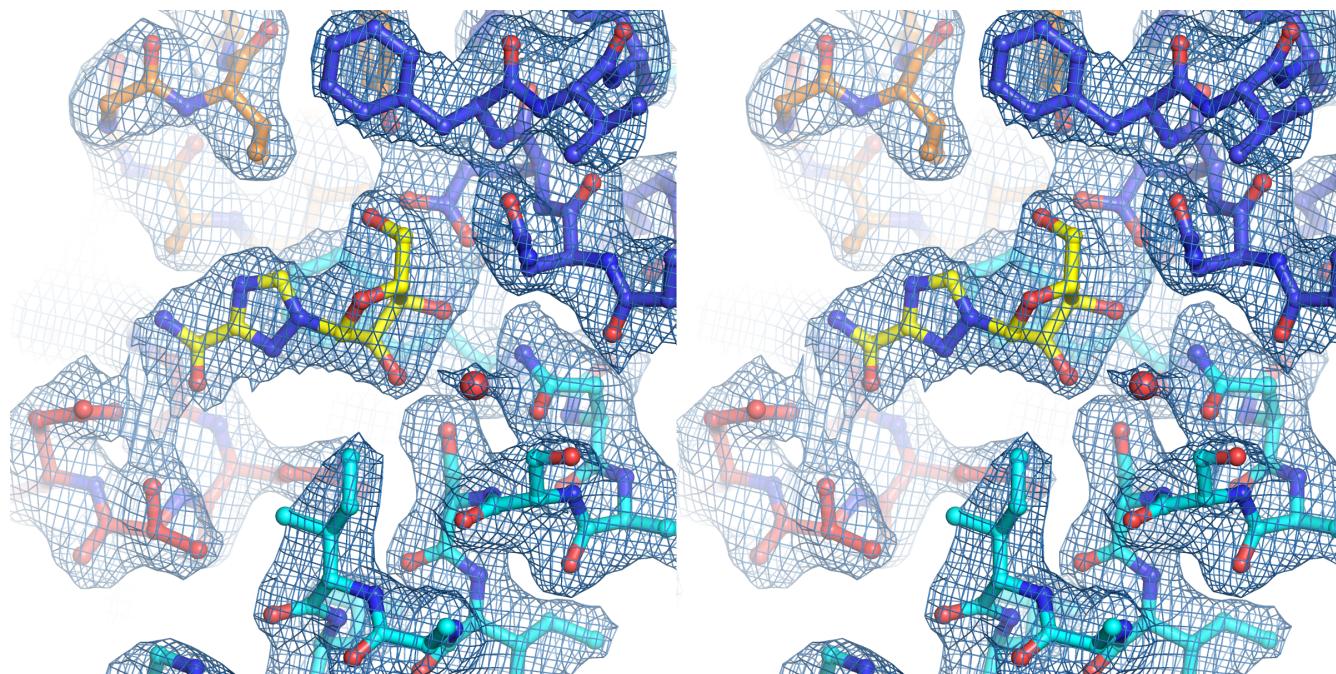

**Figure 2 – figure supplement 3. Electron density at the nucleoside-binding site of vcCNT-7C8C-ribavirin.** The nucleoside-binding site of vcCNT-7C8C bound to ribavirin is shown in stereo in stick representation in the same orientation and colored as in Figure 2D. Ribavirin is yellow and the red sphere is a water molecule. The resolution is 2.8 Å and density shown is from a  $2F_o - F_c$  electron density map contoured at  $1\sigma$ .
