# Supplementary material for: Structural basis of nucleoside and nucleoside drug selectivity by concentrative nucleoside transporters
Source: eLife journal article supplement (doi:10.7554/elife.03604), 2014-07-31
Supplement: supp [file elife_poa_e03604_Figure_2_figure_supplement_4.pdf › elife_poa_e03604_Figure_2_figure_supplement_4.pdf]

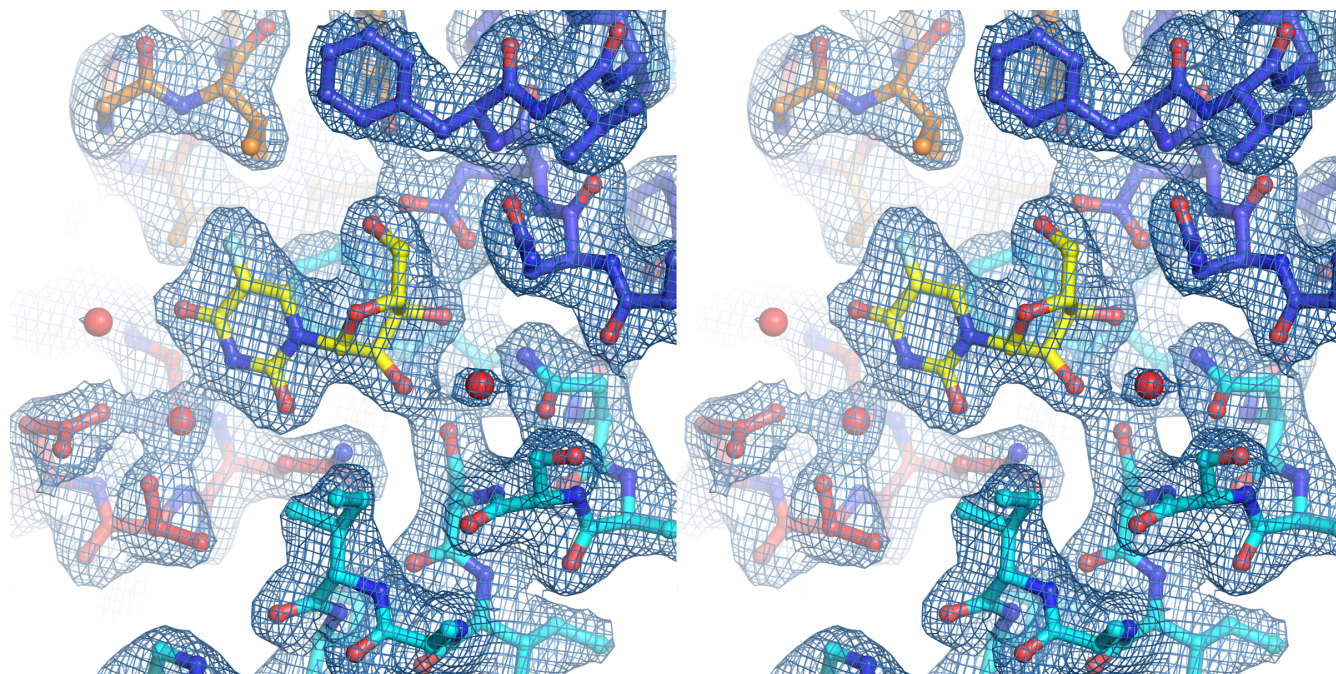

**Figure 2 – figure supplement 4. Electron density at the nucleoside-binding site of vcCNT-7C8C-5-fluorouridine.** The nucleoside-binding site of vcCNT-7C8C bound to 5-fluorouridine is shown in stereo in stick representation in the same orientation and colored as in Figure 2E. 5-fluorouridine is yellow and the red spheres are water molecules. The resolution is 2.3 Å and density shown is from a  $2F_o - F_c$  electron density map contoured at  $1\sigma$ .
