# Supplementary material for: Structural basis of nucleoside and nucleoside drug selectivity by concentrative nucleoside transporters
Source: eLife journal article supplement (doi:10.7554/elife.03604), 2014-07-31
Supplement: supp [file elife_poa_e03604_Figure_3_figure_supplement_1.pdf › elife_poa_e03604_Figure_3_figure_supplement_1.pdf]

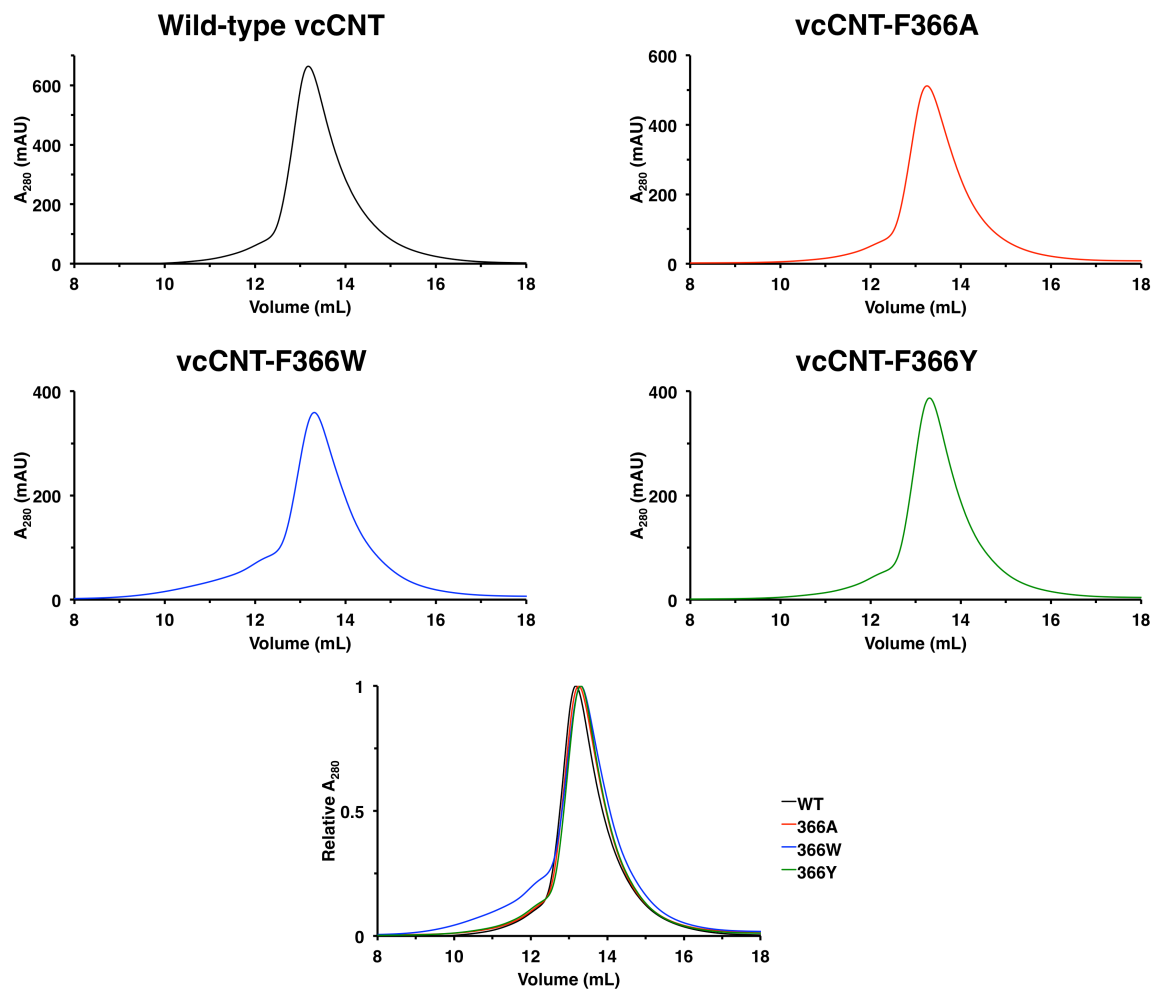

**Figure 3 – figure supplement 1. F366 mutants are biochemically stable.** 1 L of each construct was expressed and purified in parallel without the addition of any exogenous nucleosides as described in the methods. Each sample was initially purified by size-exclusion chromatography using a Superdex 200 10/300 GL column to remove MBP, and then the peak fractions were collected, concentrated, and re-ran to generate the figures. Each individual chromatogram is shown in the top panels with absolute absorbance at 280 nm on the y-axis, and all of the normalized chromatograms are shown overlaid in the bottom panel.
