# Supplementary material for: Structural basis of nucleoside and nucleoside drug selectivity by concentrative nucleoside transporters
Source: eLife journal article supplement (doi:10.7554/elife.03604), 2014-07-31
Supplement: supp [file elife_poa_e03604_Figure_5_figure_supplement_2.pdf › elife_poa_e03604_Figure_5_figure_supplement_2.pdf]

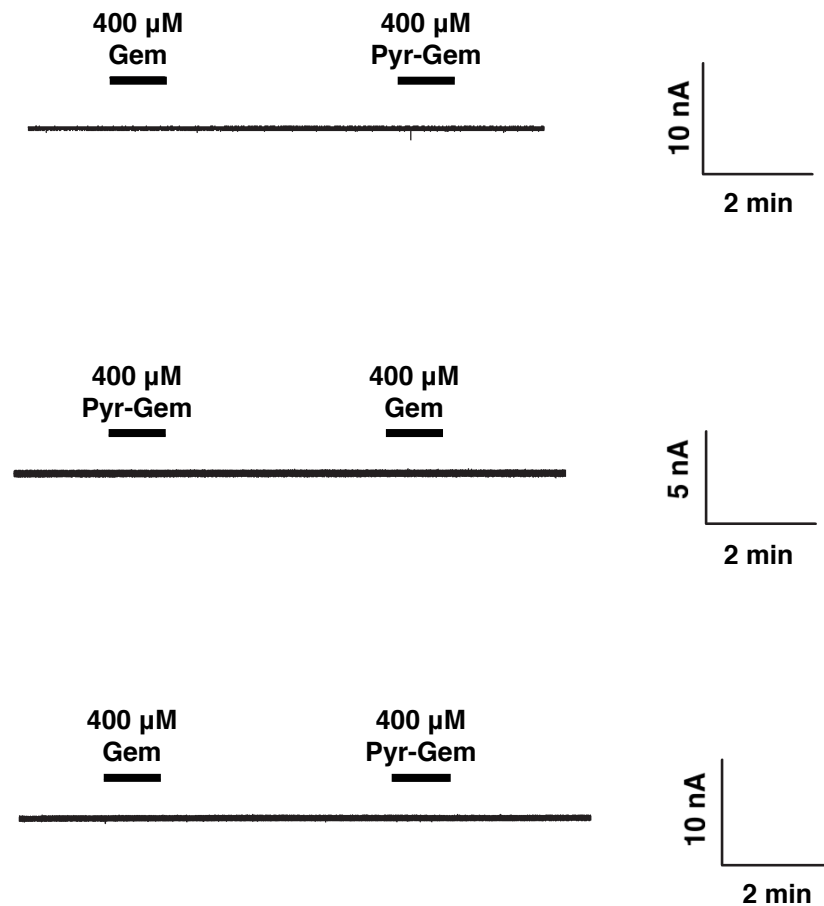

**Figure 5 – figure supplement 2. Water-injected oocytes do not respond to gemcitabine or pyrrolo-gemcitabine treatment.** Current traces are shown for three different oocyte experiments. Experiments were performed in the same manner as those in 5C and 5D except water-injected oocytes were used.
