# Supplementary material for: Structural basis of nucleoside and nucleoside drug selectivity by concentrative nucleoside transporters
Source: eLife. 2014 Jul 31;3:e03604. doi: 10.7554/eLife.03604 (PMC4139061; doi:10.7554/eLife.03604)
Supplement: Table 2—source data 1. — For pyrrolo-cytidine and pyrrolo-gemcitabine, individual solutions with fixed nucleoside concentrations and increasing concentrations of vcCNT were prepared, the fluorescence anisotropy was measured, and the data were fit globally to a single-site binding model accounting for ligand depletion. For all other nucleosides, the nucleoside of interest was titrated into solution containing vcCNT and pyrrolo-cytidine 5 μl at a time, the fluorescence anisotropy was measured, and the data were fit globally to a single-site competitive binding model accounting for ligand depletion. All experiments were performed at least three times. DOI: http://dx.doi.org/10.7554/eLife.03604.008 [file elife03604s001.xlsx]

## Sheet: Uridine
Table 2 - Source data 1. Fluorescence data for KD calculations. For pyrrolo-cytidine and pyrrolo-gemcitabine, individual solutions with fixed nucleoside concentrations and increasing concentrations of vcCNT were prepared, the fluorescence anisotropy was measured, and the data were fit globally to a single-site binding model accounting for ligand depletion. For all other nucleosides, the nucleosid…
	[uridine] (μM)	[pyrrolo-cytidine] (μM)	[vcCNT] (μM)	mAnisotropy
Exp. 1	0	2	5.4	190.4
	1.9802	1.9802	5.34653	191.3
	4.90196	1.96078	5.29412	182
	7.76699	1.94175	5.24272	185
	26.9231	1.92308	5.19231	175
	55.2381	1.90476	5.14286	161.8
	83.0189	1.88679	5.09434	150.2
	110.28	1.86916	5.04673	143.4
	294.444	1.85185	5	113
	566.972	1.83486	4.95413	94.2
	834.545	1.81818	4.90909	85.5
	2628.83	1.8018	4.86486	74.1
	4391.07	1.78571	4.82143	71.8
Exp. 2	0	2	5.4	185.3
	1.9802	1.9802	5.34653	177.3
	4.90196	1.96078	5.29412	175.9
	7.76699	1.94175	5.24272	176.7
	26.9231	1.92308	5.19231	164.1
	55.2381	1.90476	5.14286	156
	83.0189	1.88679	5.09434	145.4
	110.28	1.86916	5.04673	137.6
	294.444	1.85185	5	107.7
	566.972	1.83486	4.95413	82.1
	834.545	1.81818	4.90909	86.4
	2628.83	1.8018	4.86486	61.1
	4391.07	1.78571	4.82143	54.7
Exp. 3	0	2	5.4	184.9
	1.9802	1.9802	5.34653	179
	4.90196	1.96078	5.29412	181.5
	7.76699	1.94175	5.24272	174.6
	26.9231	1.92308	5.19231	167.3
	55.2381	1.90476	5.14286	158.6
	83.0189	1.88679	5.09434	150.4
	269.159	1.86916	5.04673	113.6
	544.444	1.85185	5	88
	814.679	1.83486	4.95413	75.4
	2625.45	1.81818	4.90909	62.4
	4403.6	1.8018	4.86486	59.4
	[cytidine] (μM)	[pyrrolo-cytidine] (μM)	[vcCNT] (μM)	mAnisotropy
Exp. 1	0	2	5.4	181.9
	1.9802	1.9802	5.34653	175.3
	4.90196	1.96078	5.29412	173.3
	7.76699	1.94175	5.24272	170
	26.9231	1.92308	5.19231	166.7
	55.2381	1.90476	5.14286	155.5
	83.0189	1.88679	5.09434	152
	110.28	1.86916	5.04673	144.6
	294.444	1.85185	5	122.9
	566.972	1.83486	4.95413	111.7
	834.545	1.81818	4.90909	97.6
	1097.3	1.8018	4.86486	90.2
	2873.21	1.78571	4.82143	82.3
	4617.7	1.76991	4.77876	70.9
	6331.58	1.75439	4.73684	73.7
Exp. 2	0	2	5.4	183.6
	1.9802	1.9802	5.34653	182.9
	4.90196	1.96078	5.29412	180.5
	7.76699	1.94175	5.24272	177.1
	26.9231	1.92308	5.19231	180.8
	55.2381	1.90476	5.14286	168.4
	83.0189	1.88679	5.09434	160.5
	110.28	1.86916	5.04673	155.6
	294.444	1.85185	5	131.5
	566.972	1.83486	4.95413	112.5
	834.545	1.81818	4.90909	96.8
	1097.3	1.8018	4.86486	96.1
	2873.21	1.78571	4.82143	82.9
	4617.7	1.76991	4.77876	68
	6331.58	1.75439	4.73684	71.3
Exp. 3	0	2	5.4	180.4
	1.9802	1.9802	5.34653	175.9
	4.90196	1.96078	5.29412	172.8
	7.76699	1.94175	5.24272	170.8
	26.9231	1.92308	5.19231	165.2
	55.2381	1.90476	5.14286	158
	83.0189	1.88679	5.09434	151.2
	110.28	1.86916	5.04673	147.6
	294.444	1.85185	5	125.4
	566.972	1.83486	4.95413	110.6
	834.545	1.81818	4.90909	100.4
	1097.3	1.8018	4.86486	95.8
	2873.21	1.78571	4.82143	83.2
	4617.7	1.76991	4.77876	77.6
	6331.58	1.75439	4.73684	78.1
	[adenosine] (μM)	[pyrrolo-cytidine] (μM)	[vcCNT] (μM)	mAnisotropy
Exp. 1	0	1	5	180.5
	4.95	0.99	4.95	179.2
	9.8	0.98	4.9	176.7
	19.4	0.971	4.85	172.4
	48.1	0.962	4.81	174.3
	76.2	0.952	4.76	173.3
	170	0.943	4.72	169.1
	348.624	0.917	4.59	157.4
	607.143	0.893	4.46	141.9
	1000	1	5	140.5
	2000	1	5	118.3
	4000	1	5	96.2
	8000	1	5	67.6
Exp. 2	0	2	5.4	176.1
	1.98	1.98	5.35	172.7
	4.9	1.96	5.29	173.1
	7.77	1.94	5.24	170.9
	26.9	1.92	5.19	173.4
	55.2	1.9	5.14	168.4
	83	1.89	5.09	167.1
	110.28	1.87	5.05	165.5
	201.852	1.85	5	157.2
	291.743	1.83	4.95	162.5
	500	1.82	4.91	148.2
	800	1.8	4.86	145.1
	1000	1.79	4.82	139.7
	3000	1.77	4.78	109.4
	5000	1.75	4.74	83.9
	7000	1.74	4.7	84.3
	8000	1.72	4.66	81.2
	9000	1.71	4.62	71.4
Exp. 3	0	1	5	165.6
	4.9505	0.990099	4.9505	162.6
	9.80392	0.980392	4.90196	154.4
	19.4175	0.970874	4.85437	155.4
	48.0769	0.961538	4.80769	160
	76.1905	0.952381	4.7619	151.4
	169.811	0.943396	4.71698	142.2
	348.624	0.917431	4.58716	126.8
	607.143	0.892857	4.46429	120.9
	1000	1	5	136.7
	2000	1	5	119.8
	4000	1	5	93.8
	8000	1	5	68.1
Exp. 4	0	1	5	178.3
	4.9505	0.990099	4.9505	183.6
	9.80392	0.980392	4.90196	179.8
	19.4175	0.970874	4.85437	170.7
	48.0769	0.961538	4.80769	167.9
	76.1905	0.952381	4.7619	160.3
	169.811	0.943396	4.71698	151.7
	348.624	0.917431	4.58716	142.1
	607.143	0.892857	4.46429	136.5
	1000	1	5	146.6
	2000	1	5	130.5
	4000	1	5	108.5
	8000	1	5	71.6
	[gemcitabine] (μM)	[pyrrolo-cytidine] (μM)	[vcCNT] (μM)	mAnisotropy
Exp. 1	0	1	5	191.6
	49.5	0.99	4.95	186.2
	98	0.98	4.9	188.3
	194.175	0.971	4.85	184
	288.462	0.962	4.81	183.9
	761.905	0.952	4.76	174.3
	1226.41	0.943	4.72	170.8
	2149.53	0.935	4.67	163.5
	3055.56	0.926	4.63	152.1
	4818.18	0.909	4.55	139.6
	7000	0.909	4.55	121.1
	10000	0.901	4.5	85
	20000	0.893	4.46	86.6
Exp. 2	0	1	5	177
	49.5	0.99	4.95	172.5
	98	0.98	4.9	173
	194.175	0.971	4.85	172.2
	288.462	0.962	4.81	166.7
	761.905	0.952	4.76	162.3
	1226.41	0.943	4.72	152.1
	2149.53	0.935	4.67	141.8
	3055.56	0.926	4.63	134
	4818.18	0.909	4.55	127.5
	7000	0.909	4.55	109.2
	10000	0.901	4.5	82.6
	20000	0.893	4.46	75.1
Exp. 3	0	1	5	172.3
	49.5	0.99	4.95	168
	98	0.98	4.9	168
	194.175	0.971	4.85	156.6
	288.462	0.962	4.81	151.9
	761.905	0.952	4.76	146
	1226.41	0.943	4.72	139.8
	2149.53	0.935	4.67	132.4
	3055.56	0.926	4.63	122.4
	4818.18	0.909	4.55	109.9
	7000	0.909	4.55	105
	10000	0.901	4.5	70.1
	20000	0.893	4.46	73.7
	[ribavirin] (μM)	[pyrrolo-cytidine] (μM)	[vcCNT] (μM)	mAnisotropy
Exp. 1	0	1	5	179.2
	14.8515	0.990099	4.9505	185.3
	29.4118	0.980392	4.90196	178.5
	58.2524	0.970874	4.85437	174.7
	86.5385	0.961538	4.80769	173
	228.571	0.952381	4.7619	171
	509.434	0.943396	4.71698	167
	1055.56	0.925926	4.62963	160.6
	1963.3	0.917431	4.58716	152.4
	4672.73	0.909091	4.54545	141
	9946.43	0.892857	4.46429	121.4
	17513	0.869565	4.34783	99.1
Exp. 2	0	1	5	177.5
	14.8515	0.990099	4.9505	169.9
	29.4118	0.980392	4.90196	168.1
	58.2524	0.970874	4.85437	164.7
	86.5385	0.961538	4.80769	163.4
	228.571	0.952381	4.7619	165.4
	509.434	0.943396	4.71698	157.3
	1055.56	0.925926	4.62963	154.2
	1963.3	0.917431	4.58716	150.5
	4672.73	0.909091	4.54545	129.9
	9946.43	0.892857	4.46429	109.8
	17513	0.869565	4.34783	94.1
Exp. 3	0	1	5	181.2
	14.8515	0.990099	4.9505	173.2
	29.4118	0.980392	4.90196	169.4
	58.2524	0.970874	4.85437	172.5
	86.5385	0.961538	4.80769	168.3
	228.571	0.952381	4.7619	163.3
	509.434	0.943396	4.71698	161.7
	1055.56	0.925926	4.62963	156.9
	1963.3	0.917431	4.58716	149.3
	4672.73	0.909091	4.54545	131.2
	9946.43	0.892857	4.46429	111.2
	17513	0.869565	4.34783	97
	[zebularine] (μM)	[pyrrolo-cytidine] (μM)	[vcCNT] (μM)	mAnisotropy
Exp. 1	0	2	5.4	187.2
	14.9	1.98	5.35	176.5
	44.1	1.96	5.29	171.9
	72.8	1.94	5.24	170.5
	101	1.92	5.19	160.6
	243	1.9	5.14	153.7
	524	1.89	5.09	135.1
	799.065	1.87	5.05	122.6
	1069.44	1.85	5	115.7
	2435.78	1.83	4.95	91.4
	5140.91	1.82	4.91	78.7
	7797.3	1.8	4.86	73
	10406.2	1.79	4.82	69.1
	12969	1.77	4.78	68.5
Exp. 2	0	2	5.4	182.8
	14.9	1.98	5.35	181
	44.1	1.96	5.29	177.5
	72.8	1.94	5.24	169.8
	101	1.92	5.19	166.1
	243	1.9	5.14	154.4
	524	1.89	5.09	130.3
	799	1.87	5.05	120.4
	1069.44	1.85	5	109
	2435.78	1.83	4.95	91.2
	5140.91	1.82	4.91	81.2
	7797.3	1.8	4.86	71.5
	10406.2	1.79	4.82	70.5
	12969	1.77	4.78	71.7
Exp. 3	0	2	5.4	188.3
	14.9	1.98	5.35	182.5
	44.1	1.96	5.29	173.5
	72.8	1.94	5.24	170.7
	101	1.92	5.19	168.3
	243	1.9	5.14	148.6
	524	1.89	5.09	131
	799	1.87	5.05	120.1
	1070	1.85	5	107.9
	2435.78	1.83	4.95	92.6
	5140.91	1.82	4.91	76.8
	7797.3	1.8	4.86	72.4
	10406.2	1.79	4.82	69.4
	12969	1.77	4.78	70.3
	[3-methyluridine] (μM)	[pyrrolo-cytidine] (μM)	[vcCNT] (μM)	mAnisotropy
Exp. 1	0	2	5	179.7
	1.9802	1.9802	4.9505	177.4
	4.90196	1.96078	4.90196	176.7
	7.76699	1.94175	4.85437	174.3
	26.9231	1.92308	4.80769	170.9
	55.2381	1.90476	4.7619	167.5
	83.0189	1.88679	4.71698	167.5
	110.28	1.86916	4.6729	164.2
	294.444	1.85185	4.62963	157.3
	566.972	1.83486	4.58716	150.8
	834.545	1.81818	4.54545	138.5
	2628.83	1.8018	4.5045	121.3
	4391.07	1.78571	4.46429	101.3
	6122.12	1.76991	4.42478	87.6
	7822.81	1.75439	4.38596	82.3
Exp. 2	0	2	5	174.3
	1.9802	1.9802	4.9505	172.6
	4.90196	1.96078	4.90196	172.6
	7.76699	1.94175	4.85437	173.1
	26.9231	1.92308	4.80769	169.7
	55.2381	1.90476	4.7619	167.3
	83.0189	1.88679	4.71698	163.4
	110.28	1.86916	4.6729	163.7
	294.444	1.85185	4.62963	155.8
	566.972	1.83486	4.58716	146.2
	834.545	1.81818	4.54545	140.1
	2628.83	1.8018	4.5045	126.4
	4391.07	1.78571	4.46429	108.8
	6122.12	1.76991	4.42478	96.5
	7822.81	1.75439	4.38596	82.5
Exp. 3	0	2	5	179.9
	1.9802	1.9802	4.9505	179.6
	4.90196	1.96078	4.90196	179.4
	7.76699	1.94175	4.85437	176.4
	26.9231	1.92308	4.80769	174.1
	55.2381	1.90476	4.7619	171.1
	83.0189	1.88679	4.71698	168.4
	110.28	1.86916	4.6729	161.8
	294.444	1.85185	4.62963	157.7
	566.972	1.83486	4.58716	148.3
	834.545	1.81818	4.54545	141.9
	2628.83	1.8018	4.5045	120.3
	4391.07	1.78571	4.46429	107
	6122.12	1.76991	4.42478	92.2
	7822.81	1.75439	4.38596	82.1
	[5-fluorouridine] (μM)	[pyrrolo-cytidine] (μM)	[vcCNT] (μM)	mAnisotropy
Exp. 1	0	2	5.4	184.7
	1.98	1.98	5.35	178
	4.9	1.96	5.29	177.3
	7.77	1.94	5.24	170.1
	26.9	1.92	5.19	152.5
	55.2	1.9	5.14	141
	83	1.89	5.09	131.4
	110.28	1.87	5.05	127.6
	294.444	1.85	5	98.9
	566.972	1.83	4.95	94.5
	834.545	1.82	4.91	89.4
	2628.83	1.8	4.86	80.1
	4391.07	1.79	4.82	78.8
	6122.12	1.77	4.78	77.8
Exp. 2	0	2	5.4	181.3
	1.98	1.98	5.35	176.1
	4.9	1.96	5.29	176.1
	7.77	1.94	5.24	168.7
	26.9	1.92	5.19	157.8
	55.2	1.9	5.14	137.6
	83	1.89	5.09	126.7
	110	1.87	5.05	116.9
	294.444	1.85	5	92.7
	566.972	1.83	4.95	76.3
	834.545	1.82	4.91	70
	2628.83	1.8	4.86	67.8
	4391.07	1.79	4.82	61
	6122.12	1.77	4.78	67.5
Exp. 3	0	2	5.4	190.1
	1.98	1.98	5.35	180.5
	4.9	1.96	5.29	178.7
	7.77	1.94	5.24	182.2
	26.9	1.92	5.19	166
	55.2	1.9	5.14	146.1
	83	1.89	5.09	131
	110	1.87	5.05	128.9
	294	1.85	5	100.2
	566.972	1.83	4.95	80.5
	834.545	1.82	4.91	79.4
	2628.83	1.8	4.86	74
	4391.07	1.79	4.82	65.3
	6122.12	1.77	4.78	65.5
	[5-chlorouridine] (μM)	[pyrrolo-cytidine] (μM)	[vcCNT] (μM)	mAnisotropy
Exp. 1	0	2	5	185
	1.48515	1.9802	4.9505	181.8
	3.72549	1.96078	4.90196	177.8
	5.92233	1.94175	4.85437	174.1
	20.2885	1.92308	4.80769	157.6
	42	1.90476	4.7619	140.5
	63.3019	1.88679	4.71698	126.2
	84.2056	1.86916	4.6729	115.1
	222.315	1.85185	4.62963	76.5
	431.284	1.83486	4.58716	57
	636.455	1.81818	4.54545	50.4
	1982.07	1.8018	4.5045	43.7
	3303.66	1.78571	4.46429	39.2
Exp. 2	0	2	5	189.8
	1.48515	1.9802	4.9505	185.9
	3.72549	1.96078	4.90196	182.2
	5.92233	1.94175	4.85437	177.3
	20.2885	1.92308	4.80769	161.3
	42	1.90476	4.7619	141.1
	63.3019	1.88679	4.71698	129.2
	84.2056	1.86916	4.6729	119.3
	222.315	1.85185	4.62963	88.8
	431.284	1.83486	4.58716	75
	636.455	1.81818	4.54545	66.9
	1982.07	1.8018	4.5045	62.8
	3303.66	1.78571	4.46429	56.7
Exp. 3	0	2	5	193.4
	1.48515	1.9802	4.9505	191.3
	3.72549	1.96078	4.90196	186
	5.92233	1.94175	4.85437	180.9
	20.2885	1.92308	4.80769	162.1
	42	1.90476	4.7619	141.4
	63.3019	1.88679	4.71698	129.9
	84.2056	1.86916	4.6729	119.9
	222.315	1.85185	4.62963	87.6
	431.284	1.83486	4.58716	67.7
	636.455	1.81818	4.54545	64.9
	1982.07	1.8018	4.5045	60.5
	3303.66	1.78571	4.46429	56.6
	[5-iodouridine] (μM)	[pyrrolo-cytidine] (μM)	[vcCNT] (μM)	mAnisotropy
Exp. 1	0	2	5	184.6
	1.9802	1.9802	4.9505	181.5
	4.90196	1.96078	4.90196	177.4
	7.76699	1.94175	4.85437	174.3
	26.9	1.92308	4.80769	165.8
	55.2	1.90476	4.7619	150.2
	83.0189	1.88679	4.71698	138.6
	110.28	1.86916	4.6729	130.8
	294.444	1.85185	4.62963	123.6
	566.972	1.83486	4.58716	95.2
	834.545	1.81818	4.54545	78.2
	2000	1.8018	4.5045	46.2
	5000	1.78571	4.46429	38.3
Exp. 2	0	2	5	186.3
	1.9802	1.9802	4.9505	183.1
	4.90196	1.96078	4.90196	181.1
	7.76699	1.94175	4.85437	180
	26.9231	1.92308	4.80769	169.2
	55.2381	1.90476	4.7619	161.1
	83.0189	1.88679	4.71698	145.3
	110.28	1.86916	4.6729	135.3
	294.444	1.85185	4.62963	103.8
	566.972	1.83486	4.58716	86.6
	834.545	1.81818	4.54545	77.1
	2000	1.8018	4.5045	46.3
	5000	1.78571	4.46429	38.5
Exp. 3	0	2	5	191.9
	1.9802	1.9802	4.9505	191.3
	4.90196	1.96078	4.90196	188.7
	7.76699	1.94175	4.85437	187.8
	26.9231	1.92308	4.80769	177.4
	55.2381	1.90476	4.7619	163.5
	83.0189	1.88679	4.71698	155.2
	110.28	1.86916	4.6729	146.2
	294.444	1.85185	4.62963	117.8
	566.972	1.83486	4.58716	86.9
	834.545	1.81818	4.54545	74.5
	2000	1.8018	4.5045	53.4
	5000	1.78571	4.46429	39.9
	[5-methyluridine] (μM)	[pyrrolo-cytidine] (μM)	[vcCNT] (μM)	mAnisotropy
Exp. 1	0	2	5	179.5
	1.98	1.98	4.95	178.2
	4.9	1.96	4.9	175.8
	7.77	1.94	4.85	175.5
	26.9	1.92	4.81	169
	55.2	1.9	4.76	161.6
	83	1.89	4.72	154.3
	110.28	1.87	4.67	145.2
	294.444	1.85	4.63	119.9
	566.972	1.83	4.59	95.7
	834.545	1.82	4.55	86.9
	2628.83	1.8018	4.5045	67.8
	4390	1.79	4.46	60.4
Exp. 2	0	2	5	171.1
	1.98	1.98	4.95	169.9
	4.9	1.96	4.9	165.3
	7.77	1.94	4.85	164.6
	26.9	1.92	4.81	155.2
	55.2	1.9	4.76	149.2
	83	1.89	4.72	141.5
	110.28	1.87	4.67	134.7
	294.444	1.85	4.63	110.3
	566.972	1.83	4.59	87.4
	834.545	1.82	4.55	74.4
	2628.83	1.8018	4.5045	58.8
	4390	1.79	4.46	48.3
Exp. 3	0	2	5	185.6
	1.98	1.98	4.95	182.2
	4.9	1.96	4.9	181.6
	7.77	1.94	4.85	176.6
	26.9	1.92	4.81	172.3
	55.2	1.9	4.76	161.8
	83	1.89	4.72	156.8
	110.28	1.87	4.67	147.8
	294.444	1.85	4.63	121
	566.972	1.83	4.59	99.4
	834.545	1.82	4.55	88.8
	2628.83	1.8018	4.5045	70
	4390	1.79	4.46	55.2
	[2'-deoxyuridine] (μM)	[pyrrolo-cytidine] (μM)	[vcCNT] (μM)	mAnisotropy
Exp. 1	0	2	5	185.2
	0.198	1.98	4.95	180.8
	0.882	1.96	4.9	181.7
	2.82	1.94	4.85	177.4
	9.52	1.92	4.81	176.9
	28.5	1.9	4.76	170.9
	94.2	1.89	4.72	164.6
	280.28	1.87	4.67	150.3
	925.833	1.85	4.63	122.5
	2752.2	1.83	4.59	87.6
	9090.82	1.82	4.55	64.5
Exp. 2	0	2	5	182.8
	0.198	1.98	4.95	181.3
	0.882	1.96	4.9	181.8
	2.82	1.94	4.85	181.8
	9.52	1.92	4.81	177.7
	28.5	1.9	4.76	176.6
	94.2	1.89	4.72	165
	280.28	1.87	4.67	146.7
	925.833	1.85	4.63	115.3
	2752.2	1.83	4.59	88.2
	9090.82	1.82	4.55	67.5
Exp. 3	0	2	5	182.2
	0.198	1.98	4.95	181.4
	0.882	1.96	4.9	180.8
	2.82	1.94	4.85	178.1
	9.52	1.92	4.81	175.6
	28.5	1.9	4.76	172.8
	94.2	1.89	4.72	166.6
	280.28	1.87	4.67	150
	925.833	1.85	4.63	120.8
	2752.2	1.83	4.59	92.6
	9090.82	1.82	4.55	68.7
	[3'-deoxyuridine] (μM)	[pyrrolo-cytidine] (μM)	[vcCNT] (μM)	mAnisotropy
Exp. 1	0	2	5	186.8
	0.198	1.98	4.95	189.1
	0.882	1.96	4.9	185.9
	2.82	1.94	4.85	185.2
	9.52	1.92	4.81	184.2
	28.5	1.9	4.76	182.6
	94.2	1.89	4.72	182.3
	280.28	1.87	4.67	180.7
	925.833	1.85	4.63	181.6
	2752.2	1.83	4.59	177.1
	9090.82	1.82	4.55	179.1
	15315.2	1.8	4.5	174.7
	21428.5	1.79	4.46	170.4
	27433.5	1.77	4.42	166
Exp. 2	0	1	5	187.9
	2.82	0.971	4.85	180.2
	9.52	0.962	4.81	183.1
	28.4762	0.952	4.76	181.9
	94.2453	0.943	4.72	181
	280.28	0.935	4.67	178.3
	925.833	0.926	4.63	181.1
	2752.2	0.917	4.59	178.4
	9090.82	0.909	4.55	176.8
	15315.2	0.901	4.5	173.2
	21428.5	0.893	4.46429	168.8
	27400	0.885	4.42	167.5
Exp. 3	0	1	5	181.8
	2.81553	0.971	4.85	179.5
	94.2453	0.943	4.71698	178.3
	925.833	0.926	4.62963	173.6
	9090.82	0.909	4.54545	173.6
	15315.2	0.901	4.5045	167.9
	21428.5	0.893	4.46429	166.2
	27433.5	0.885	4.42478	162.7
	[5'-deoxyuridine] (μM)	[pyrrolo-cytidine] (μM)	[vcCNT] (μM)	mAnisotropy
Exp. 1	0	2	5	183.9
	0.198	1.98	4.95	180.1
	0.882	1.96	4.9	177.8
	2.82	1.94	4.85	177.8
	9.52	1.92	4.81	175.5
	28.5	1.9	4.76	175.5
	94.2	1.89	4.72	173.3
	280.28	1.87	4.67	170
	925.833	1.85	4.63	170.6
	2752.2	1.83	4.59	157.8
	7272.64	1.82	4.55	143.3
	11711.6	1.8	4.5	125.9
	16071.3	1.79	4.46	113.9
	20353.9	1.77	4.42	105.2
	24561.3	1.75	4.39	100.9
	28695.6	1.74	4.35	86.3
Exp. 2	0	1	5	178.2
	2.82	0.971	4.85	168.5
	9.52	0.962	4.81	167.7
	94.2	0.943	4.72	164.2
	925.833	0.926	4.63	155.1
	2752.2	0.917	4.59	147.7
	7272.64	0.909	4.55	129.2
	11711.6	0.901	4.5	111.8
	16071.3	0.893	4.46	105.7
	20353.9	0.885	4.42	93.7
	24561.3	0.877	4.39	93.3
	28695.6	0.87	4.35	83.4
Exp. 3	0	1	5	188.2
	2.82	0.971	4.85	183
	9.52	0.962	4.81	183.6
	94.2	0.943	4.72	179.1
	925.833	0.926	4.63	173.1
	2752.2	0.917	4.59	165.3
	7272.64	0.909	4.55	150.9
	11711.6	0.901	4.5	138.8
	16071.3	0.893	4.46	123.4
	20353.9	0.885	4.42	114.9
	24561.3	0.877	4.39	115.7
	28695.6	0.87	4.35	115.6
	[cytarabine] (μM)	[pyrrolo-cytidine] (μM)	[vcCNT] (μM)	mAnisotropy
Exp. 1	0	1	5	190.6
	2.97	0.990099	4.9505	189.9
	5.88	0.980392	4.90196	189.3
	20.4	0.970874	4.85437	187
	49	0.961538	4.80769	187.2
	77.1	0.952381	4.7619	188.6
	218	0.943396	4.71698	188.9
	496	0.934579	4.6729	187.1
	769	0.925926	4.62963	189
	2139	0.917431	4.58716	183.2
	4846	0.909091	4.54545	186
	7505	0.900901	4.5045	181.1
	10117	0.892857	4.46429	176.7
	12682	0.884956	4.42478	179.8
Exp. 2	0	1	5	172.7
	49.505	0.990099	4.9505	174.4
	98.0392	0.980392	4.90196	173
	242.718	0.970874	4.85437	173
	384.615	0.961538	4.80769	173.9
	761.905	0.952381	4.7619	174.9
	1132.08	0.943396	4.71698	177.6
	2523.36	0.934579	4.6729	175
	3888.89	0.925926	4.62963	172.8
	8440.37	0.917431	4.58716	174.2
Exp. 3	0	1	5	177.5
	49.505	0.990099	4.9505	173
	98.0392	0.980392	4.90196	173.9
	242.718	0.970874	4.85437	173.1
	384.615	0.961538	4.80769	171
	761.905	0.952381	4.7619	173.4
	1132.08	0.943396	4.71698	168.7
	2523.36	0.934579	4.6729	168.8
	3888.89	0.925926	4.62963	172
	8440.37	0.917431	4.58716	169.9
	[pyrrolo-cytidine] (μM)	[vcCNT] (μM)	mAnisotropy
Exp. 1	4.95	0	16
	4.95	0.21	33.6
	4.95	0.7	66.2
	4.95	2.07	116.7
	4.95	7	198.7
	4.95	20.7	234
	4.95	70	257.5
	4.95	207	258.8
Exp. 2	4.95	0	11.3
	4.95	0.21	25.3
	4.95	0.7	48.6
	4.95	2.07	108.4
	4.95	4.64	158.2
	4.95	7	181.8
	4.95	20.7	227.4
	4.95	70	249.7
Exp. 3	4.95	0	16.2
	4.95	0.21	38.5
	4.95	0.7	65.2
	4.95	2.07	117.9
	4.95	4.64	165.7
	4.95	7	186.5
	4.95	20.7	234.1
	4.95	70	260.5
	[pyrrolo-gemcitabine] (μM)	[vcCNT] (μM)	mAnisotropy
Exp. 1	2	0	44.1
	2	1	45.4
	2	2.5	55.8
	2	5	72.7
	2	10	92.3
	2	25	127.1
	2	50	153.7
	2	100	173.8
	2	200	187.8
Exp. 2	2	0	33.7
	2	1	36.3
	2	2.5	48.4
	2	5	68.7
	2	10	80
	2	25	118
	2	50	139.6
	2	100	165
	2	200	174.6
Exp. 3	2	0	35.1
	2	1	43.5
	2	2.5	48.8
	2	5	59.5
	2	10	79.5
	2	25	110.9
	2	50	136.3

## Sheet: Cytidine
	[pyrrolo-cytidine] (μM)	[cytidine] (μM)	[vcCNT] (μM)	mAnisotropy
Exp. 1	2	0	5.4	181.9
	1.9802	1.9802	5.34653	175.3
	1.96078	4.90196	5.29412	173.3
	1.94175	7.76699	5.24272	170
	1.92308	26.9231	5.19231	166.7
	1.90476	55.2381	5.14286	155.5
	1.88679	83.0189	5.09434	152
	1.86916	110.28	5.04673	144.6
	1.85185	294.444	5	122.9
	1.83486	566.972	4.95413	111.7
	1.81818	834.545	4.90909	97.6
	1.8018	1097.3	4.86486	90.2
	1.78571	2873.21	4.82143	82.3
	1.76991	4617.7	4.77876	70.9
	1.75439	6331.58	4.73684	73.7
Exp. 2	2	0	5.4	183.6
	1.9802	1.9802	5.34653	182.9
	1.96078	4.90196	5.29412	180.5
	1.94175	7.76699	5.24272	177.1
	1.92308	26.9231	5.19231	180.8
	1.90476	55.2381	5.14286	168.4
	1.88679	83.0189	5.09434	160.5
	1.86916	110.28	5.04673	155.6
	1.85185	294.444	5	131.5
	1.83486	566.972	4.95413	112.5
	1.81818	834.545	4.90909	96.8
	1.8018	1097.3	4.86486	96.1
	1.78571	2873.21	4.82143	82.9
	1.76991	4617.7	4.77876	68
	1.75439	6331.58	4.73684	71.3
Exp. 3	2	0	5.4	180.4
	1.9802	1.9802	5.34653	175.9
	1.96078	4.90196	5.29412	172.8
	1.94175	7.76699	5.24272	170.8
	1.92308	26.9231	5.19231	165.2
	1.90476	55.2381	5.14286	158
	1.88679	83.0189	5.09434	151.2
	1.86916	110.28	5.04673	147.6
	1.85185	294.444	5	125.4
	1.83486	566.972	4.95413	110.6
	1.81818	834.545	4.90909	100.4
	1.8018	1097.3	4.86486	95.8
	1.78571	2873.21	4.82143	83.2
	1.76991	4617.7	4.77876	77.6
	1.75439	6331.58	4.73684	78.1

## Sheet: Adenosine
	[pyrrolo-cytidine] (μM)	[adenosine] (μM)	[vcCNT] (μM)	mAnisotropy
Exp. 1	1	0	5	180.5
	0.99	4.95	4.95	179.2
	0.98	9.8	4.9	176.7
	0.971	19.4	4.85	172.4
	0.962	48.1	4.81	174.3
	0.952	76.2	4.76	173.3
	0.943	170	4.72	169.1
	0.917	348.624	4.59	157.4
	0.893	607.143	4.46	141.9
	1	1000	5	140.5
	1	2000	5	118.3
	1	4000	5	96.2
	1	8000	5	67.6
Exp. 2	2	0	5.4	176.1
	1.98	1.98	5.35	172.7
	1.96	4.9	5.29	173.1
	1.94	7.77	5.24	170.9
	1.92	26.9	5.19	173.4
	1.9	55.2	5.14	168.4
	1.89	83	5.09	167.1
	1.87	110.28	5.05	165.5
	1.85	201.852	5	157.2
	1.83	291.743	4.95	162.5
	1.82	500	4.91	148.2
	1.8	800	4.86	145.1
	1.79	1000	4.82	139.7
	1.77	3000	4.78	109.4
	1.75	5000	4.74	83.9
	1.74	7000	4.7	84.3
	1.72	8000	4.66	81.2
	1.71	9000	4.62	71.4
Exp. 3	1	0	5	165.6
	0.990099	4.9505	4.9505	162.6
	0.980392	9.80392	4.90196	154.4
	0.970874	19.4175	4.85437	155.4
	0.961538	48.0769	4.80769	160
	0.952381	76.1905	4.7619	151.4
	0.943396	169.811	4.71698	142.2
	0.917431	348.624	4.58716	126.8
	0.892857	607.143	4.46429	120.9
	1	1000	5	136.7
	1	2000	5	119.8
	1	4000	5	93.8
	1	8000	5	68.1
Exp. 4	1	0	5	178.3
	0.990099	4.9505	4.9505	183.6
	0.980392	9.80392	4.90196	179.8
	0.970874	19.4175	4.85437	170.7
	0.961538	48.0769	4.80769	167.9
	0.952381	76.1905	4.7619	160.3
	0.943396	169.811	4.71698	151.7
	0.917431	348.624	4.58716	142.1
	0.892857	607.143	4.46429	136.5
	1	1000	5	146.6
	1	2000	5	130.5
	1	4000	5	108.5
	1	8000	5	71.6

## Sheet: Gemcitabine
	[pyrrolo-cytidine] (μM)	[gemcitabine] (μM)	[vcCNT] (μM)	mAnisotropy
Exp. 1	1	0	5	191.6
	0.99	49.5	4.95	186.2
	0.98	98	4.9	188.3
	0.971	194.175	4.85	184
	0.962	288.462	4.81	183.9
	0.952	761.905	4.76	174.3
	0.943	1226.41	4.72	170.8
	0.935	2149.53	4.67	163.5
	0.926	3055.56	4.63	152.1
	0.909	4818.18	4.55	139.6
	0.909	7000	4.55	121.1
	0.901	10000	4.5	85
	0.893	20000	4.46	86.6
Exp. 2	1	0	5	177
	0.99	49.5	4.95	172.5
	0.98	98	4.9	173
	0.971	194.175	4.85	172.2
	0.962	288.462	4.81	166.7
	0.952	761.905	4.76	162.3
	0.943	1226.41	4.72	152.1
	0.935	2149.53	4.67	141.8
	0.926	3055.56	4.63	134
	0.909	4818.18	4.55	127.5
	0.909	7000	4.55	109.2
	0.901	10000	4.5	82.6
	0.893	20000	4.46	75.1
Exp. 3	1	0	5	172.3
	0.99	49.5	4.95	168
	0.98	98	4.9	168
	0.971	194.175	4.85	156.6
	0.962	288.462	4.81	151.9
	0.952	761.905	4.76	146
	0.943	1226.41	4.72	139.8
	0.935	2149.53	4.67	132.4
	0.926	3055.56	4.63	122.4
	0.909	4818.18	4.55	109.9
	0.909	7000	4.55	105
	0.901	10000	4.5	70.1
	0.893	20000	4.46	73.7

## Sheet: Ribavirin
	[pyrrolo-cytidine] (μM)	[ribavirin] (μM)	[vcCNT] (μM)	mAnisotropy
Exp. 1	1	0	5	179.2
	0.990099	14.8515	4.9505	185.3
	0.980392	29.4118	4.90196	178.5
	0.970874	58.2524	4.85437	174.7
	0.961538	86.5385	4.80769	173
	0.952381	228.571	4.7619	171
	0.943396	509.434	4.71698	167
	0.925926	1055.56	4.62963	160.6
	0.917431	1963.3	4.58716	152.4
	0.909091	4672.73	4.54545	141
	0.892857	9946.43	4.46429	121.4
	0.869565	17513	4.34783	99.1
Exp. 2	1	0	5	177.5
	0.990099	14.8515	4.9505	169.9
	0.980392	29.4118	4.90196	168.1
	0.970874	58.2524	4.85437	164.7
	0.961538	86.5385	4.80769	163.4
	0.952381	228.571	4.7619	165.4
	0.943396	509.434	4.71698	157.3
	0.925926	1055.56	4.62963	154.2
	0.917431	1963.3	4.58716	150.5
	0.909091	4672.73	4.54545	129.9
	0.892857	9946.43	4.46429	109.8
	0.869565	17513	4.34783	94.1
Exp. 3	1	0	5	181.2
	0.990099	14.8515	4.9505	173.2
	0.980392	29.4118	4.90196	169.4
	0.970874	58.2524	4.85437	172.5
	0.961538	86.5385	4.80769	168.3
	0.952381	228.571	4.7619	163.3
	0.943396	509.434	4.71698	161.7
	0.925926	1055.56	4.62963	156.9
	0.917431	1963.3	4.58716	149.3
	0.909091	4672.73	4.54545	131.2
	0.892857	9946.43	4.46429	111.2
	0.869565	17513	4.34783	97

## Sheet: Zebularine
	[pyrrolo-cytidine] (μM)	[zebularine] (μM)	[vcCNT] (μM)	mAnisotropy
Exp. 1	2	0	5.4	187.2
	1.98	14.9	5.35	176.5
	1.96	44.1	5.29	171.9
	1.94	72.8	5.24	170.5
	1.92	101	5.19	160.6
	1.9	243	5.14	153.7
	1.89	524	5.09	135.1
	1.87	799.065	5.05	122.6
	1.85	1069.44	5	115.7
	1.83	2435.78	4.95	91.4
	1.82	5140.91	4.91	78.7
	1.8	7797.3	4.86	73
	1.79	10406.2	4.82	69.1
	1.77	12969	4.78	68.5
Exp. 2	2	0	5.4	182.8
	1.98	14.9	5.35	181
	1.96	44.1	5.29	177.5
	1.94	72.8	5.24	169.8
	1.92	101	5.19	166.1
	1.9	243	5.14	154.4
	1.89	524	5.09	130.3
	1.87	799	5.05	120.4
	1.85	1069.44	5	109
	1.83	2435.78	4.95	91.2
	1.82	5140.91	4.91	81.2
	1.8	7797.3	4.86	71.5
	1.79	10406.2	4.82	70.5
	1.77	12969	4.78	71.7
Exp. 3	2	0	5.4	188.3
	1.98	14.9	5.35	182.5
	1.96	44.1	5.29	173.5
	1.94	72.8	5.24	170.7
	1.92	101	5.19	168.3
	1.9	243	5.14	148.6
	1.89	524	5.09	131
	1.87	799	5.05	120.1
	1.85	1070	5	107.9
	1.83	2435.78	4.95	92.6
	1.82	5140.91	4.91	76.8
	1.8	7797.3	4.86	72.4
	1.79	10406.2	4.82	69.4
	1.77	12969	4.78	70.3

## Sheet: 3-methyluridine
	[pyrrolo-cytidine] (μM)	[3-methyluridine] (μM)	[vcCNT] (μM)	mAnisotropy
Exp. 1	2	0	5	179.7
	1.9802	1.9802	4.9505	177.4
	1.96078	4.90196	4.90196	176.7
	1.94175	7.76699	4.85437	174.3
	1.92308	26.9231	4.80769	170.9
	1.90476	55.2381	4.7619	167.5
	1.88679	83.0189	4.71698	167.5
	1.86916	110.28	4.6729	164.2
	1.85185	294.444	4.62963	157.3
	1.83486	566.972	4.58716	150.8
	1.81818	834.545	4.54545	138.5
	1.8018	2628.83	4.5045	121.3
	1.78571	4391.07	4.46429	101.3
	1.76991	6122.12	4.42478	87.6
	1.75439	7822.81	4.38596	82.3
Exp. 2	2	0	5	174.3
	1.9802	1.9802	4.9505	172.6
	1.96078	4.90196	4.90196	172.6
	1.94175	7.76699	4.85437	173.1
	1.92308	26.9231	4.80769	169.7
	1.90476	55.2381	4.7619	167.3
	1.88679	83.0189	4.71698	163.4
	1.86916	110.28	4.6729	163.7
	1.85185	294.444	4.62963	155.8
	1.83486	566.972	4.58716	146.2
	1.81818	834.545	4.54545	140.1
	1.8018	2628.83	4.5045	126.4
	1.78571	4391.07	4.46429	108.8
	1.76991	6122.12	4.42478	96.5
	1.75439	7822.81	4.38596	82.5
Exp. 3	2	0	5	179.9
	1.9802	1.9802	4.9505	179.6
	1.96078	4.90196	4.90196	179.4
	1.94175	7.76699	4.85437	176.4
	1.92308	26.9231	4.80769	174.1
	1.90476	55.2381	4.7619	171.1
	1.88679	83.0189	4.71698	168.4
	1.86916	110.28	4.6729	161.8
	1.85185	294.444	4.62963	157.7
	1.83486	566.972	4.58716	148.3
	1.81818	834.545	4.54545	141.9
	1.8018	2628.83	4.5045	120.3
	1.78571	4391.07	4.46429	107
	1.76991	6122.12	4.42478	92.2
	1.75439	7822.81	4.38596	82.1

## Sheet: 5-fluorouridine
	[pyrrolo-cytidine] (μM)	[5-fluorouridine] (μM)	[vcCNT] (μM)	mAnisotropy
Exp. 1	2	0	5.4	184.7
	1.98	1.98	5.35	178
	1.96	4.9	5.29	177.3
	1.94	7.77	5.24	170.1
	1.92	26.9	5.19	152.5
	1.9	55.2	5.14	141
	1.89	83	5.09	131.4
	1.87	110.28	5.05	127.6
	1.85	294.444	5	98.9
	1.83	566.972	4.95	94.5
	1.82	834.545	4.91	89.4
	1.8	2628.83	4.86	80.1
	1.79	4391.07	4.82	78.8
	1.77	6122.12	4.78	77.8
Exp. 2	2	0	5.4	181.3
	1.98	1.98	5.35	176.1
	1.96	4.9	5.29	176.1
	1.94	7.77	5.24	168.7
	1.92	26.9	5.19	157.8
	1.9	55.2	5.14	137.6
	1.89	83	5.09	126.7
	1.87	110	5.05	116.9
	1.85	294.444	5	92.7
	1.83	566.972	4.95	76.3
	1.82	834.545	4.91	70
	1.8	2628.83	4.86	67.8
	1.79	4391.07	4.82	61
	1.77	6122.12	4.78	67.5
Exp. 3	2	0	5.4	190.1
	1.98	1.98	5.35	180.5
	1.96	4.9	5.29	178.7
	1.94	7.77	5.24	182.2
	1.92	26.9	5.19	166
	1.9	55.2	5.14	146.1
	1.89	83	5.09	131
	1.87	110	5.05	128.9
	1.85	294	5	100.2
	1.83	566.972	4.95	80.5
	1.82	834.545	4.91	79.4
	1.8	2628.83	4.86	74
	1.79	4391.07	4.82	65.3
	1.77	6122.12	4.78	65.5

## Sheet: 5-chlorouridine
	[pyrrolo-cytidine] (μM)	[5-chlorouridine] (μM)	[vcCNT] (μM)	mAnisotropy
Exp. 1	2	0	5	185
	1.9802	1.48515	4.9505	181.8
	1.96078	3.72549	4.90196	177.8
	1.94175	5.92233	4.85437	174.1
	1.92308	20.2885	4.80769	157.6
	1.90476	42	4.7619	140.5
	1.88679	63.3019	4.71698	126.2
	1.86916	84.2056	4.6729	115.1
	1.85185	222.315	4.62963	76.5
	1.83486	431.284	4.58716	57
	1.81818	636.455	4.54545	50.4
	1.8018	1982.07	4.5045	43.7
	1.78571	3303.66	4.46429	39.2
Exp. 2	2	0	5	189.8
	1.9802	1.48515	4.9505	185.9
	1.96078	3.72549	4.90196	182.2
	1.94175	5.92233	4.85437	177.3
	1.92308	20.2885	4.80769	161.3
	1.90476	42	4.7619	141.1
	1.88679	63.3019	4.71698	129.2
	1.86916	84.2056	4.6729	119.3
	1.85185	222.315	4.62963	88.8
	1.83486	431.284	4.58716	75
	1.81818	636.455	4.54545	66.9
	1.8018	1982.07	4.5045	62.8
	1.78571	3303.66	4.46429	56.7
Exp. 3	2	0	5	193.4
	1.9802	1.48515	4.9505	191.3
	1.96078	3.72549	4.90196	186
	1.94175	5.92233	4.85437	180.9
	1.92308	20.2885	4.80769	162.1
	1.90476	42	4.7619	141.4
	1.88679	63.3019	4.71698	129.9
	1.86916	84.2056	4.6729	119.9
	1.85185	222.315	4.62963	87.6
	1.83486	431.284	4.58716	67.7
	1.81818	636.455	4.54545	64.9
	1.8018	1982.07	4.5045	60.5
	1.78571	3303.66	4.46429	56.6

## Sheet: 5-iodouridine
	[pyrrolo-cytidine] (μM)	[5-iodouridine] (μM)	[vcCNT] (μM)	mAnisotropy
Exp. 1	2	0	5	184.6
	1.9802	1.9802	4.9505	181.5
	1.96078	4.90196	4.90196	177.4
	1.94175	7.76699	4.85437	174.3
	1.92308	26.9	4.80769	165.8
	1.90476	55.2	4.7619	150.2
	1.88679	83.0189	4.71698	138.6
	1.86916	110.28	4.6729	130.8
	1.85185	294.444	4.62963	123.6
	1.83486	566.972	4.58716	95.2
	1.81818	834.545	4.54545	78.2
	1.8018	2000	4.5045	46.2
	1.78571	5000	4.46429	38.3
Exp. 2	2	0	5	186.3
	1.9802	1.9802	4.9505	183.1
	1.96078	4.90196	4.90196	181.1
	1.94175	7.76699	4.85437	180
	1.92308	26.9231	4.80769	169.2
	1.90476	55.2381	4.7619	161.1
	1.88679	83.0189	4.71698	145.3
	1.86916	110.28	4.6729	135.3
	1.85185	294.444	4.62963	103.8
	1.83486	566.972	4.58716	86.6
	1.81818	834.545	4.54545	77.1
	1.8018	2000	4.5045	46.3
	1.78571	5000	4.46429	38.5
Exp. 3	2	0	5	191.9
	1.9802	1.9802	4.9505	191.3
	1.96078	4.90196	4.90196	188.7
	1.94175	7.76699	4.85437	187.8
	1.92308	26.9231	4.80769	177.4
	1.90476	55.2381	4.7619	163.5
	1.88679	83.0189	4.71698	155.2
	1.86916	110.28	4.6729	146.2
	1.85185	294.444	4.62963	117.8
	1.83486	566.972	4.58716	86.9
	1.81818	834.545	4.54545	74.5
	1.8018	2000	4.5045	53.4
	1.78571	5000	4.46429	39.9

[truncated: 7 more sheets: 5-methyluridine, 2'-deoxyuridine, 3'-deoxyuridine, 5'-deoxyuridine, cytarabine, pyrrolo-cytidine, pyrrolo-gemcitabine]
